# Supplementary material for: Quantum chemical and molecular modeling approaches for repurposing anticoagulants against SARS-CoV-2 main protease
Source: publisher site journal article supplement (doi:10.1515/cppm-2025-0098), 2025-10-16
Supplement: Supplementary file 1 [file j_cppm-2025-0098_suppl_001.docx]

**In-silico evaluation of triazole derivatives as antimicrobial agents against *Pseudomonas aeruginosa***

**Maymoun Ghizlan1, 2, Hsaine Zgou1, 2, Meriem Khedraoui 3, Lafridi Hind1, 2,**

**Sabour Abderahman1, 2, Hakem Adnane4, El Houate Brahim5, Samir Chtita (3, *)**

1Applied Chemistry, Geo-Mines and Modelisation, Polydisicplinary Faculty of Ouarzazate, Ibn Zohr University, B.P. 8106, 80090 Agadir, Morocco.

2 Faculty of Sciences, Ibn Zohr University, Agadir, Morocco.

3Laboratory of Analytical and Molecular Chemistry, Faculty of Sciences Ben M’Sik,

Hassan II University of Casablanca, Morocco.

4Laboratory of Computer Systems and Vision, Faculty of Sciences,

Ibn Zohr University, Agadir, Morocco.

5Higher Institute of Nursing and Health Professions Errachidia, Ouarzazate, Morocco.

* Corresponding author: [samirchtita@gmail.com](mailto:samirchtita@gmail.com)

**Material supplementary**

**Table S1.** Optimized molecular structures of triazole derivatives **A-U**.

| 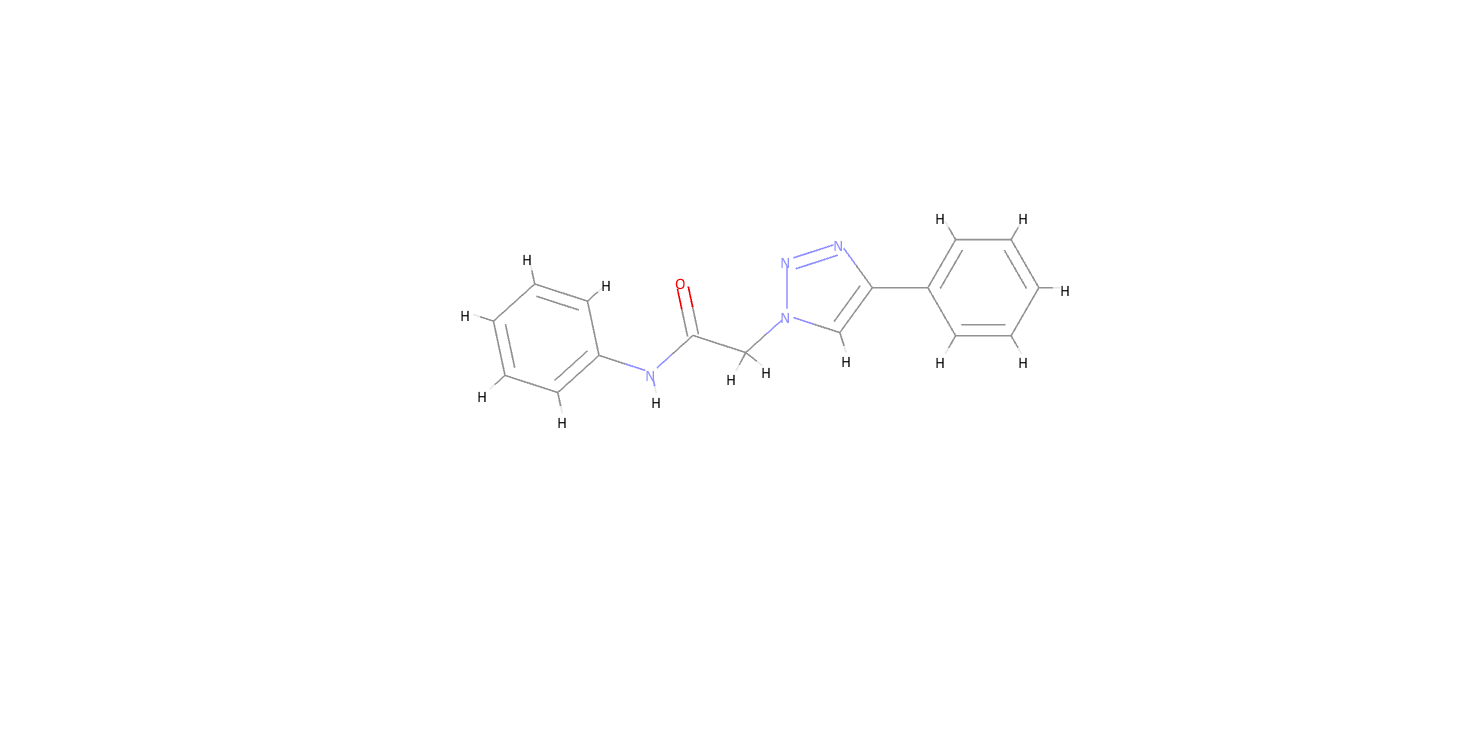 | 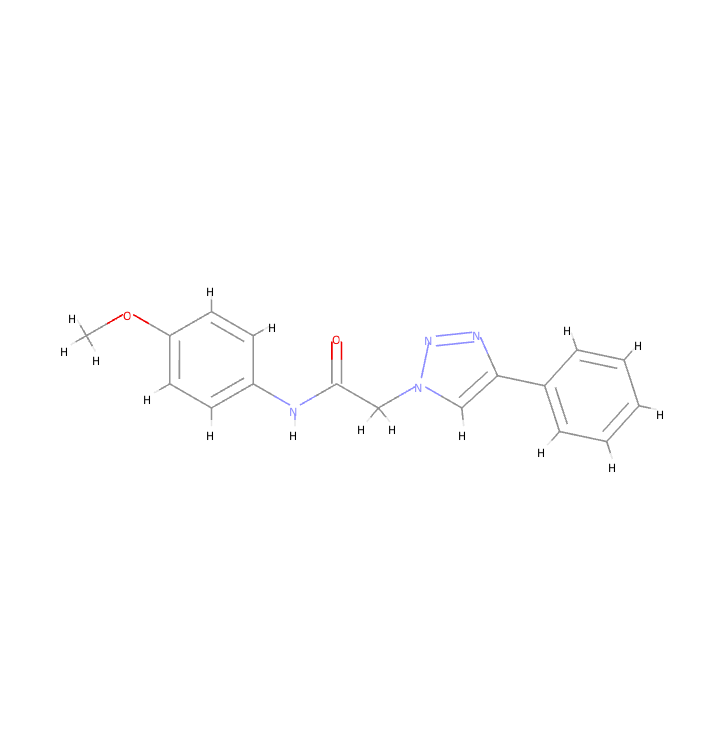 |
| --- | --- |
| (A) N Phenyl 2 (4 phenyl 1H 1,2,3 triazol 1 y-l)acetamide (C16H14N4O) (pIC50= 6.745) | (B) N (4 Methoxyphenyl) 2 (4 phenyl 1H 1,2,3 triazol 1 yl)acetamide (C17H16N4O2) (pIC50= 7.090) |
| 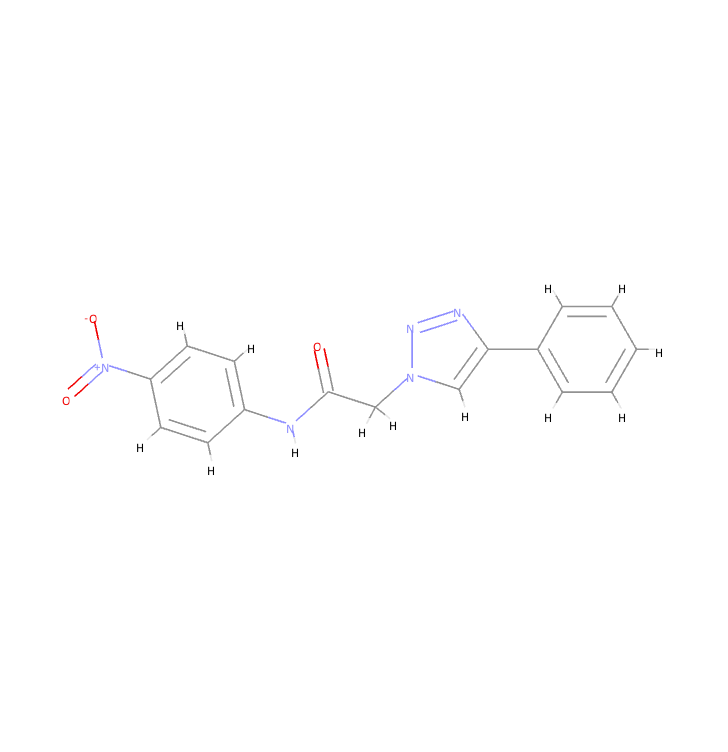 | 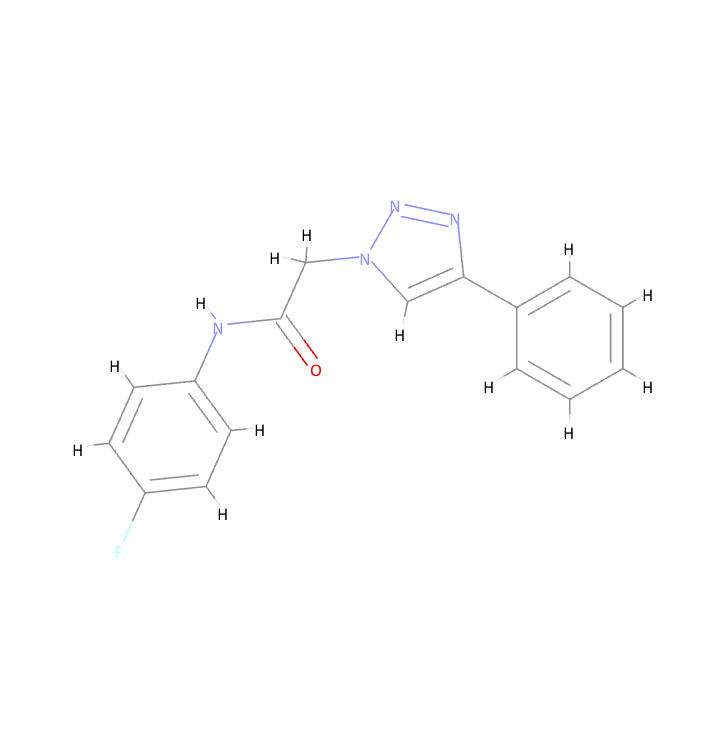 |
| (C)N (4 Nitrophenyl) 2 (4 phenyl 1H 1,2,3 t-riazol 1 yl)acetamide (C16H13N5O3) (pIC50= 7.412) | (D)N (4 Fluorophenyl) 2 (4 phenyl 1H 1,2,3 triazol 1 yl)acetamide (C16H13FN4O) (pIC50= 7.675) |
| 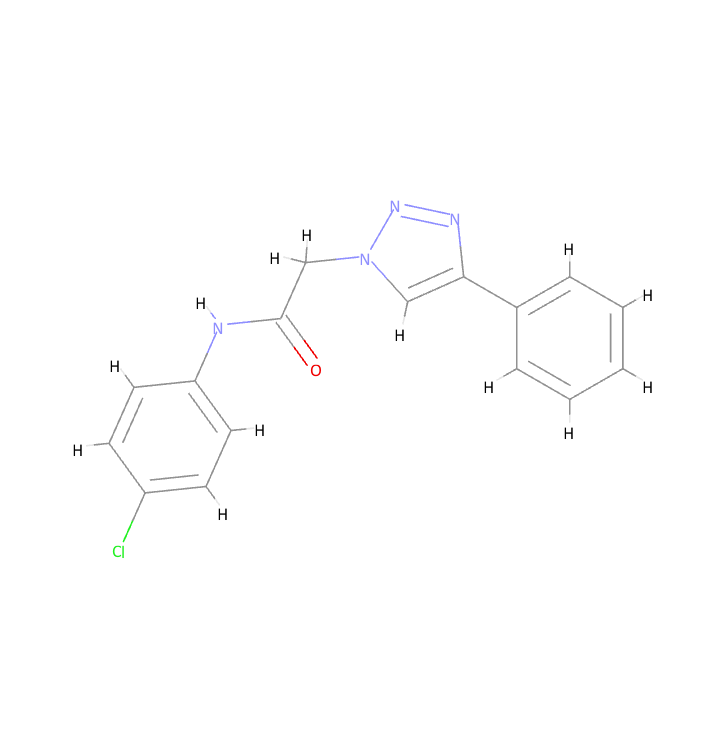 | 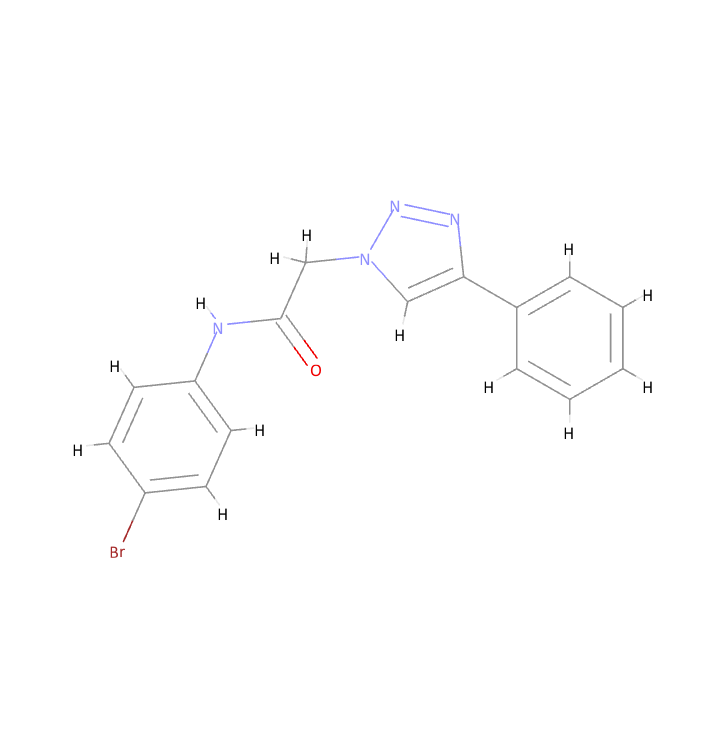 |
| (E)N (4 Chlorophenyl) 2 (4 phenyl 1H 1,2,3 triazol 1 yl)acetamide (C16H13ClN4O) (pIC50= 7.397) | (F)N (4 Bromophenyl) 2 (4 phenyl 1H 1,2,3 triazol 1 yl)acetamide (C16H13BrN4O) (pIC50= 7.455) |
| 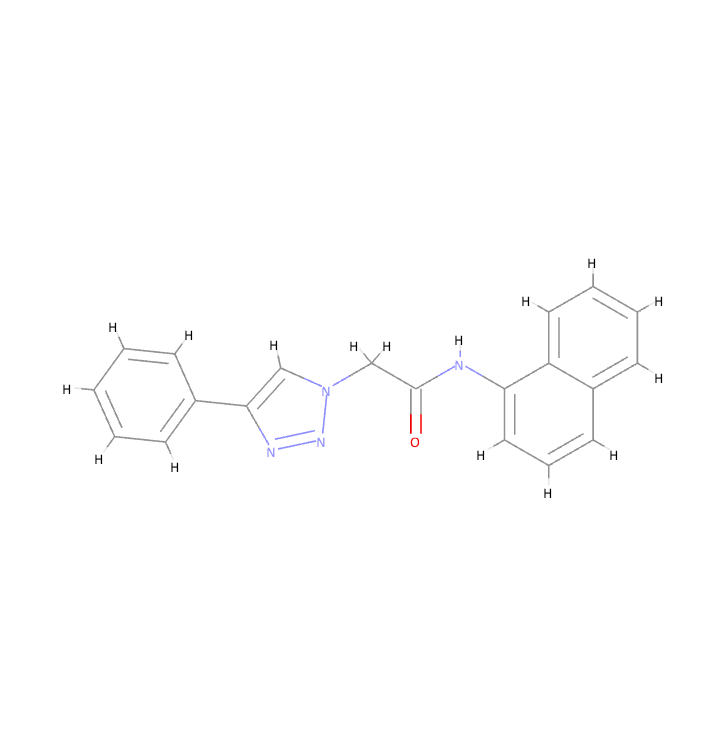 | 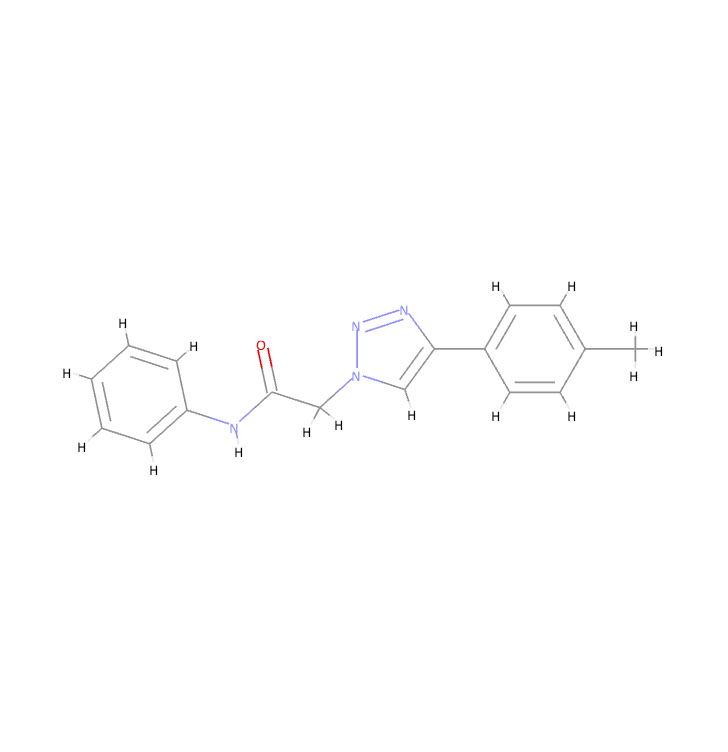 |
| (G)N (Naphthalen 1 yl) 2 (4 phenyl 1H 1,2,3 triazol 1 yl)acetamide (C20H16N4O) (pIC50= 7.419) | (H) N Phenyl 2 [4 (p tolyl) 1H 1,2,3 triazol 1 yl]acetamide (C17H16N4O) (pIC50= 7.068) |
| 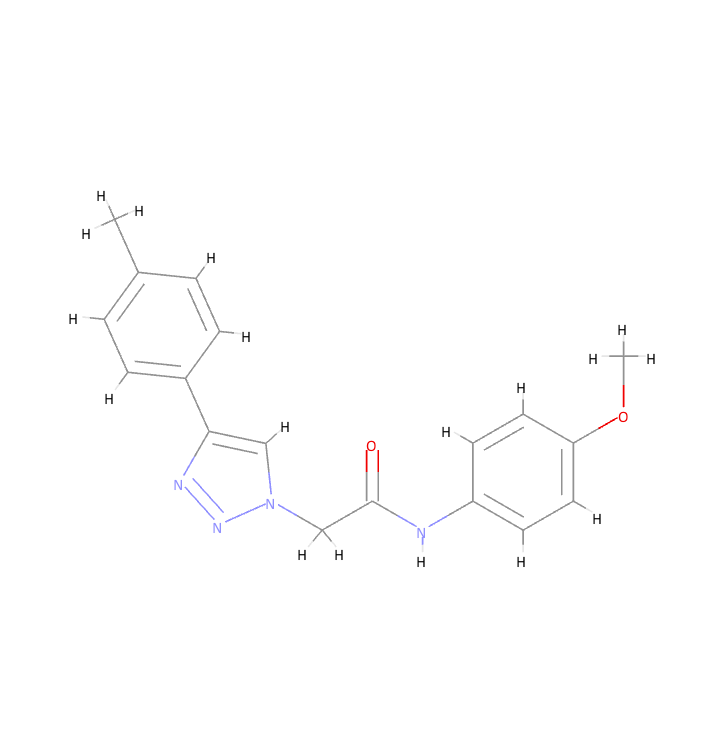 | 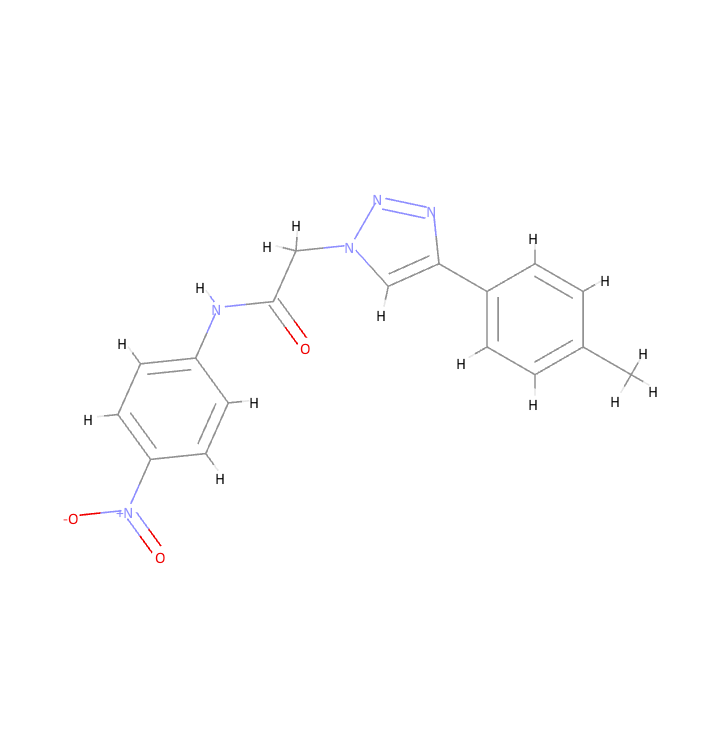 |
| (I) N (4 Methoxyphenyl) 2 [4 (p tolyl) 1H 1,2,3 triazol 1 yl]acetamide (C18H18N4O2) (pIC50= 7.110) | (J) N (4 Nitrophenyl) 2 [4 (p tolyl) 1H 1,2,3 t-riazol 1 yl]acetamide (C17H15N5O3) (pIC50= 7.430) |
| 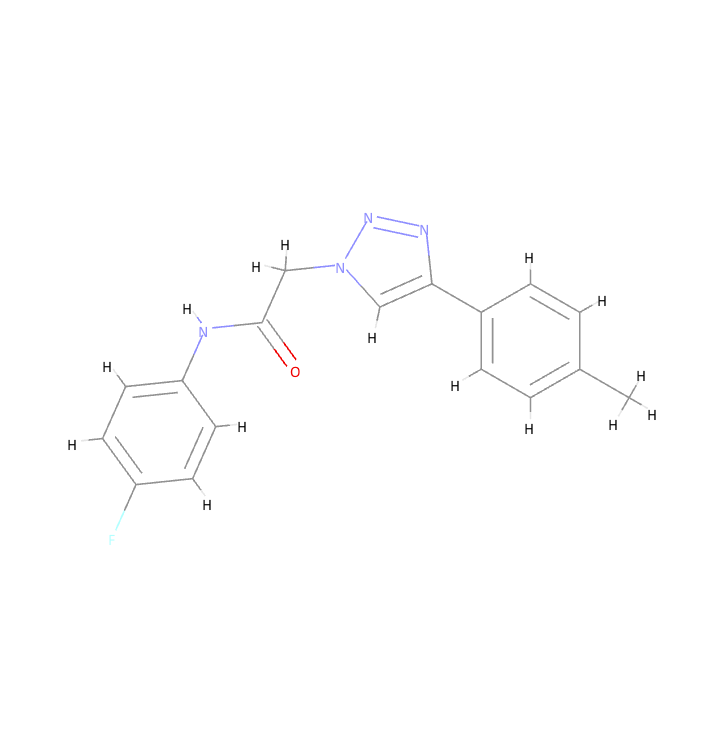 | 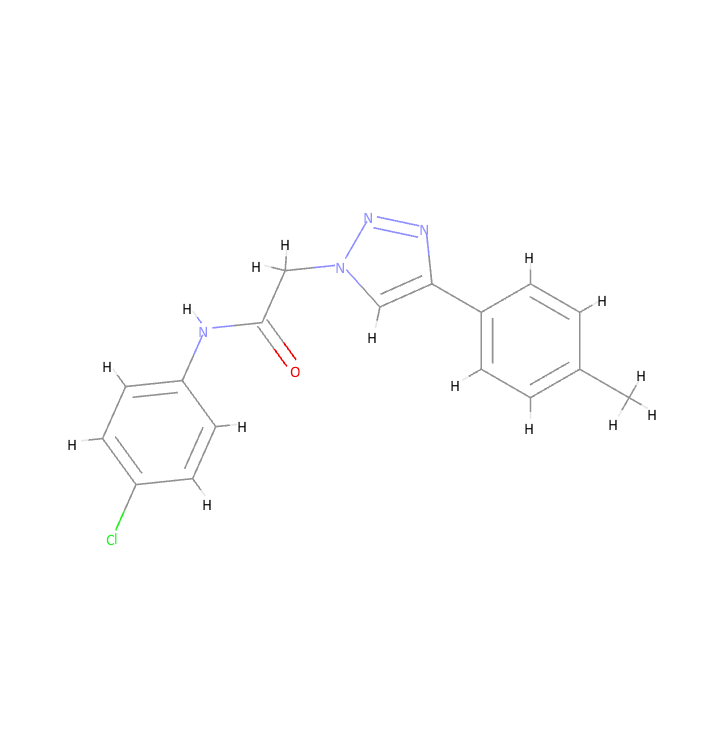 |
| (K)N (4 Fluorophenyl) 2 [4 (p tolyl) 1H 1,2,3 triazol 1 yl]acetamide (C17H15FN4O) (pIC50=7.093) | (L)N (4 Chlorophenyl) 2 [4 (p tolyl) 1H 1,2,3 triazol 1 yl]acetamide (C17H15ClN4O) (pIC50= 6.514) |
| 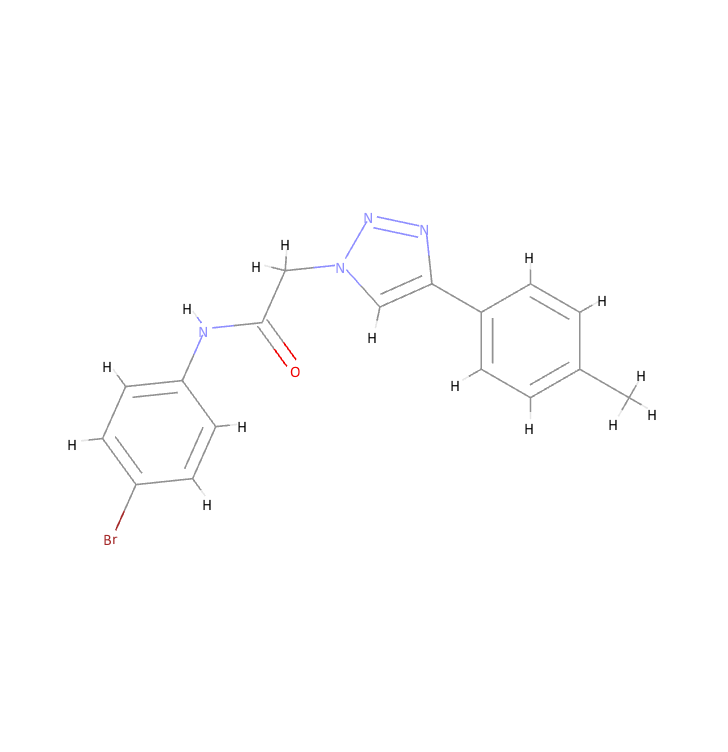 | 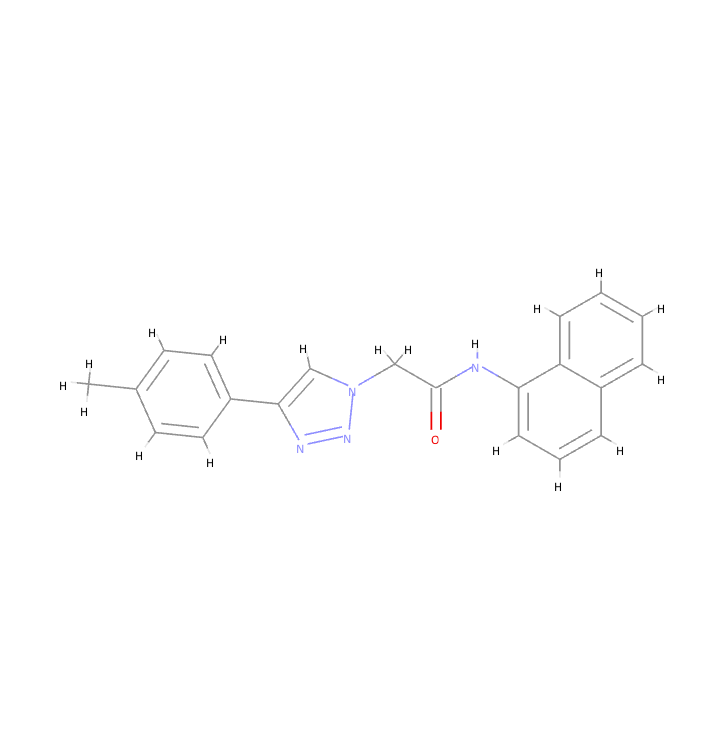 |
| (M)N (4 Bromophenyl) 2 [4 (p tolyl) 1H 1,2,3 triazol 1 yl]acetamide (C17H15BrN4O) (pIC50= 7.774) | (N)N (Naphthalen 1 yl) 2 [4 (p tolyl) 1H 1,2,3 triazol 1 yl]acetamide (C21H18N4O) (pIC50= 6.835) |
| 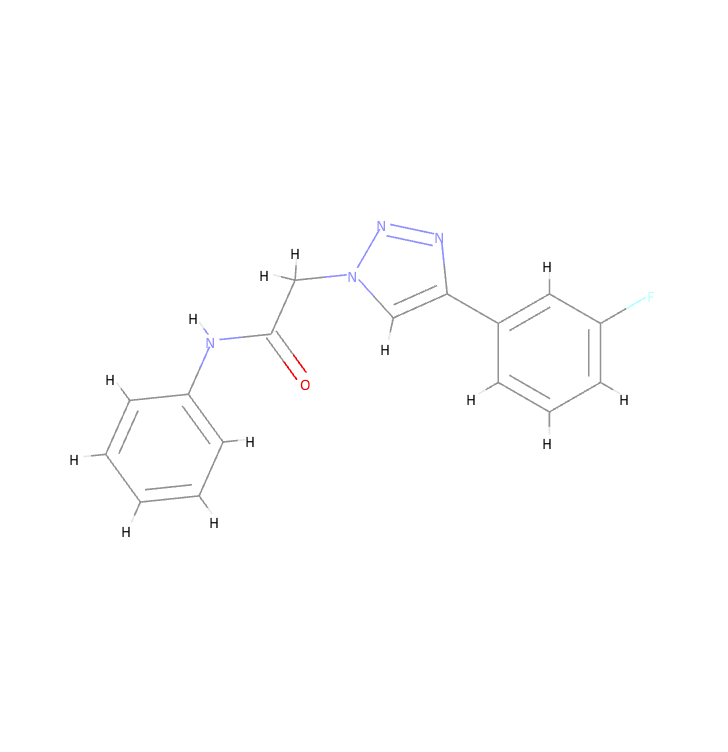 | 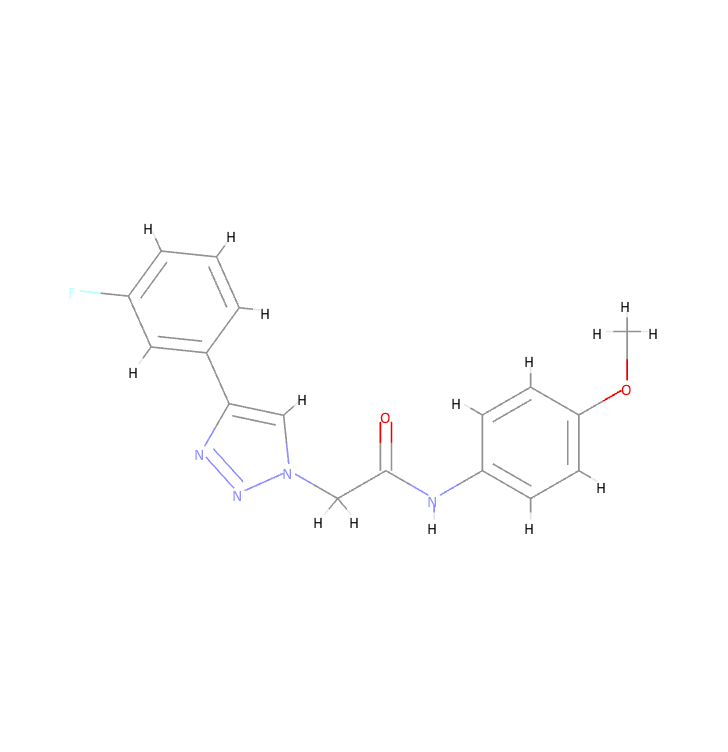 |
| (O)2 [4 (3 Fluorophenyl) 1H 1,2,3 triazol 1 yl] N phenylacetamide (C16H13FN4O) (pIC50= 7.376) | (P)2 [4 (3 Fluorophenyl) 1H 1,2,3 triazol 1 yl] N (4 methoxyphenyl)acetamide (C17H15FN4O2) (pIC50= 7.416) |
| 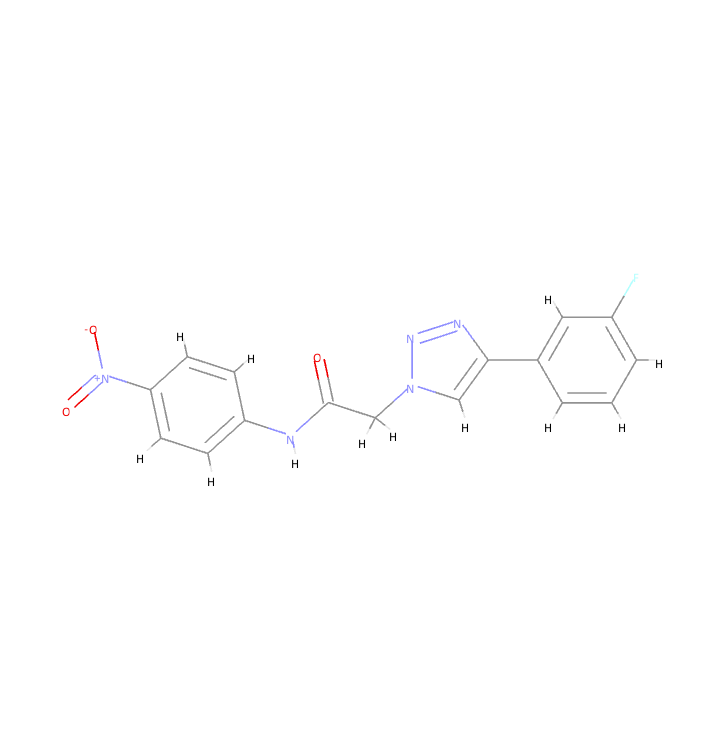 | 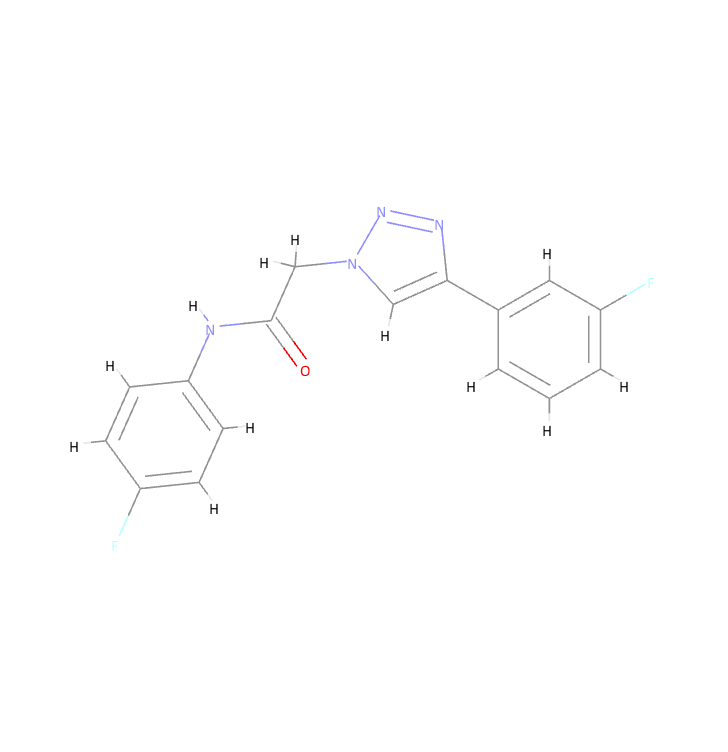 |
| (Q) 2 [4 (3 Fluorophenyl) 1H 1,2,3 triazol 1 yl] N (4 nitrophenyl)acetamide (C16H12FN5O3) (pIC50= 7.436) | (R)N (4 Fluorophenyl) 2 [4 (3 fluorophenyl) 1H 1,2,3 triazol 1 yl]acetamide (C16H12F2N4O) (pIC50= 7.701) |
| 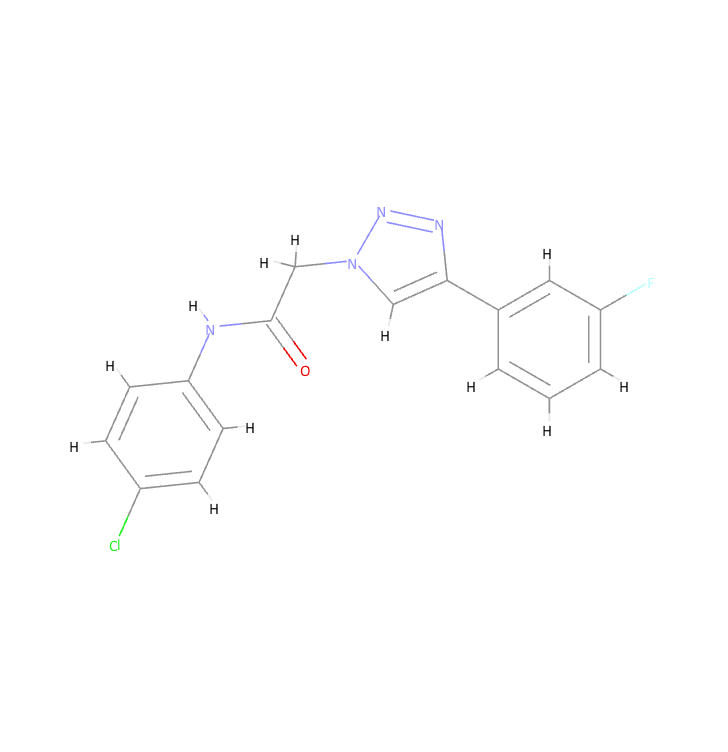 | 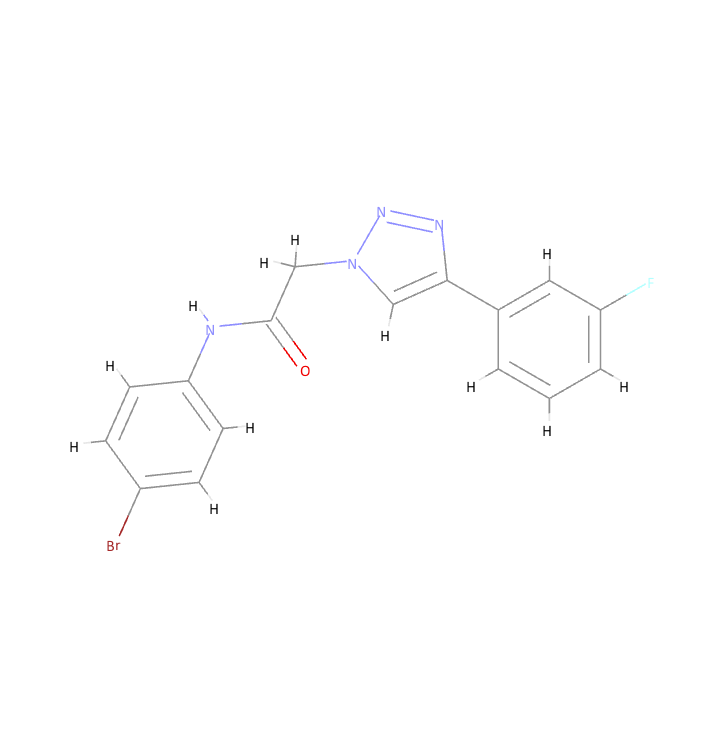 |
| (S)N (4 Chlorophenyl) 2 [4 (3 fluorophenyl) 1H 1,2,3 triazol 1 yl]acetamide (C16H12ClFN4O) (pIC50= 7.422) | (T) N (4 Bromophenyl) 2 [4 (3 fluorophenyl) 1H 1,2,3 triazol 1 yl]acetamide (C16H12BrFN4O) (pIC50=7.477) |
| 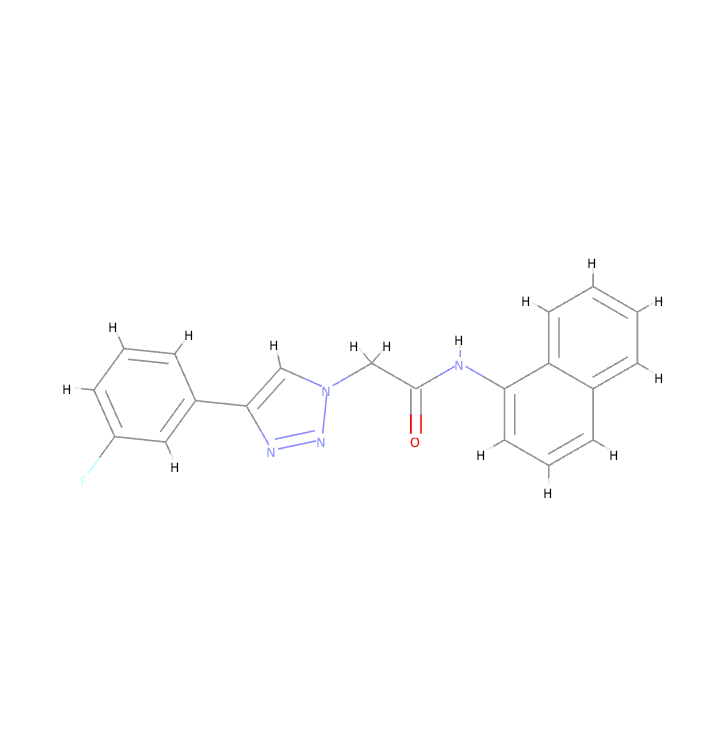 |  |
| (U)2 [4 (3 Fluorophenyl) 1H 1,2,3 triazol 1 yl] N (naphthalen 1 yl)acetamide (C20H15FN4O) (pIC50= 7.442) |  |
